# Supplementary material for: The Effectiveness of Semi-Automated and Fully Automatic Segmentation for Inferior Alveolar Canal Localization on CBCT Scans: A Systematic Review
Source: MDPI journal article supplement (doi:10.3390/ijerph19010560), 2022-01-04
Supplement: s1 [file s1]

## QUADAS-2 tool questions

|                         |                                                                                                     | Yes | No | Unclear | Not applicable |
|-------------------------|-----------------------------------------------------------------------------------------------------|-----|----|---------|----------------|
| Patient selection       | Was a consecutive or random sample of patients enrolled?                                            |     |    |         |                |
|                         | Was a case-control design avoided?                                                                  |     |    |         |                |
|                         | Did the study avoid inappropriate exclusions?                                                       |     |    |         |                |
| Index tests             | Were the index test results interpreted without knowledge of the results of the reference standard? |     |    |         |                |
|                         | If a threshold was used, was it pre-specified?                                                      |     |    |         |                |
| Reference standard/test | Is the reference standard likely to correctly classify the target condition?                        |     |    |         |                |
|                         | Were the reference standard results interpreted without knowledge of the results of the index test? |     |    |         |                |
| Flow and timing         | Was there an appropriate interval between the index test and reference standard?                    |     |    |         |                |
|                         | Did all patients receive the same reference standard?                                               |     |    |         |                |
|                         | Were all patients included in the analysis?                                                         |     |    |         |                |
