# Supplementary material for: The Effectiveness of Semi-Automated and Fully Automatic Segmentation for Inferior Alveolar Canal Localization on CBCT Scans: A Systematic Review
Source: MDPI journal article supplement (doi:10.3390/ijerph19010560), 2022-01-04
Supplement: s1 [file s1]

### Searching stagey:

Searched database: PubMed, Medline, Web of Science, Cochrane (Wiley) and Scopus

Searching Date: 22-08-2021

No filters applied and no publication date restrictions.

#### 1- PubMed:

| Search | Query                                                                                                                                                                                                                                                                                                        | Field     | Records retrieved |
|--------|--------------------------------------------------------------------------------------------------------------------------------------------------------------------------------------------------------------------------------------------------------------------------------------------------------------|-----------|-------------------|
| #1     | algorithm OR algorithm* OR "artificial intelligence" OR AI OR automatic OR automated OR semi-automatic OR semi-automated OR "deep learning" OR "Convolutional neural network" OR CNN OR "machine learning"                                                                                                   | All Field | 1,761,241         |
| #2     | "mandibular canal" OR "inferior alveolar canal" OR "inferior alveolar nerve"                                                                                                                                                                                                                                 | All Field | 3,872             |
| #3     | #1 AND #2<br>(algorithm OR algorithm* OR "artificial intelligence" OR AI OR automatic OR automated OR semi-automatic OR semi-automated OR "deep learning" OR "Convolutional neural network" OR CNN OR "machine learning") AND ("mandibular canal" OR "inferior alveolar canal" OR "inferior alveolar nerve") |           | 78                |

#### 2- Medline (Ovid):

| Search | Query                                                                                                                                                                                              | Field                                                                                                                                     | Records retrieved |
|--------|----------------------------------------------------------------------------------------------------------------------------------------------------------------------------------------------------|-------------------------------------------------------------------------------------------------------------------------------------------|-------------------|
| #1     | algorithm OR algorithm* OR artificial intelligence OR AI OR automatic OR automated OR semi-automatic OR semi-automated OR deep learning OR Convolutional neural network OR CNN OR machine learning | .mp.<br>[mp=title,<br>abstract,<br>original<br>title,<br>name of<br>substance<br>word,<br>subject<br>heading<br>word,<br>floating<br>sub- | 553,434           |

|    |                                                                        |                                                                                                                                                                                      |       |
|----|------------------------------------------------------------------------|--------------------------------------------------------------------------------------------------------------------------------------------------------------------------------------|-------|
|    |                                                                        | heading word, keyword heading word, organism supplementary concept word, protocol supplementary concept word, rare disease supplementary concept word, unique identifier, synonyms ] |       |
| #2 | mandibular canal or inferior alveolar canal or inferior alveolar nerve | .mp.<br>[mp=title, abstract, original title, name of substance word, subject heading word, floating sub-heading word, keyword heading word, organism supplementary                   | 3,281 |

|    |           |                                                                                                                                                                                   |    |
|----|-----------|-----------------------------------------------------------------------------------------------------------------------------------------------------------------------------------|----|
|    |           | ntary<br>concept<br>word,<br>protocol<br>suppleme<br>ntary<br>concept<br>word, rare<br>disease<br>suppleme<br>ntary<br>concept<br>word,<br>unique<br>identifier,<br>synonyms<br>] |    |
| #3 | #1 AND #2 |                                                                                                                                                                                   | 46 |

Cochrane (Wiley):

| Search | Query                                                                                                                                                                                                              | Field                           | Records<br>retrieved |
|--------|--------------------------------------------------------------------------------------------------------------------------------------------------------------------------------------------------------------------|---------------------------------|----------------------|
| #1     | algorithm OR algorithm* OR “artificial intelligence” OR AI<br>OR automatic OR automated OR semi-automatic OR semi-<br>automated OR deep learning OR “Convolutional neural<br>network” OR CNN OR “machine learning” | Title/Abst<br>ract/Key<br>words | 36,696               |
| #2     | “mandibular canal” or “inferior alveolar canal” or “inferior<br>alveolar nerve”                                                                                                                                    | Title/Abst<br>ract/Key<br>words | 757                  |
| #3     | #1 AND #2                                                                                                                                                                                                          |                                 | 3                    |

Web of Science:

| Search | Query                                                                                                                                                                                                                      | Field                                 | Records<br>retrieved |
|--------|----------------------------------------------------------------------------------------------------------------------------------------------------------------------------------------------------------------------------|---------------------------------------|----------------------|
| #1     | ALL=(algorithm OR algorithm* OR “artificial intelligence”<br>OR AI OR automatic OR automated OR semi-automatic OR<br>semi-automated OR “deep learning” OR “Convolutional<br>neural network” OR CNN OR “machine learning” ) | Index<br>es=SCI<br>-<br>EXPA<br>NDED, | 3,698,137            |

|    |                                                                                                                                             |                                                                                                                                                                                           |       |
|----|---------------------------------------------------------------------------------------------------------------------------------------------|-------------------------------------------------------------------------------------------------------------------------------------------------------------------------------------------|-------|
|    |                                                                                                                                             | SSCI,<br>A&HCI<br>, CPCI-<br>S,<br>CPCI-<br>SSH,<br>BKCI-<br>S,<br>BKCI-<br>SSH,<br>ESCI,<br>CCR-<br>EXPA<br>NDED,<br>IC<br>Times<br>pan=A<br>II                                          |       |
| #2 | ALL=("mandibular canal" OR "inferior alveolar canal" OR "inferior alveolar nerve")                                                          | Index<br>es=SCI<br>-<br>EXPA<br>NDED,<br>SSCI,<br>A&HCI<br>, CPCI-<br>S,<br>CPCI-<br>SSH,<br>BKCI-<br>S,<br>BKCI-<br>SSH,<br>ESCI,<br>CCR-<br>EXPA<br>NDED,<br>IC<br>Times<br>pan=A<br>II | 3,717 |
| #3 | #1 AND #2<br>(ALL=(algorithm OR algorithm* OR "artificial intelligence" OR AI<br>automatic OR automated OR semi-automatic OR semi-automated |                                                                                                                                                                                           | 50    |

|  |                                                                                                                                                                            |  |
|--|----------------------------------------------------------------------------------------------------------------------------------------------------------------------------|--|
|  | OR “deep learning” OR “Convolutional neural network” OR CNN OR “machine learning”)) AND ALL=(“mandibular canal” OR “inferior alveolar canal” OR “inferior alveolar nerve”) |  |
|--|----------------------------------------------------------------------------------------------------------------------------------------------------------------------------|--|

Scopus: 19/08/2021

| Search | Query                                                                                                                                                                                                                                                                                                                        | Field     | Records retrieved |
|--------|------------------------------------------------------------------------------------------------------------------------------------------------------------------------------------------------------------------------------------------------------------------------------------------------------------------------------|-----------|-------------------|
| #1     | ALL ( algorithm OR algorithm* OR "artificial intelligence" OR ai OR automatic OR automated OR semi-automatic OR semi-automated OR "deep learning" OR "Convolutional neural network" OR cnn OR “machine learning”)                                                                                                            | All Field | 10,303,872        |
| #2     | ALL ( "mandibular canal" OR "inferior alveolar canal" OR "inferior alveolar nerve" )                                                                                                                                                                                                                                         | All Field | 4,820             |
| #3     | #1 AND #2<br>( ALL ( algorithm OR algorithm* OR "artificial intelligence" OR ai OR automatic OR automated OR semi-automatic OR semi-automated OR "deep learning" OR "Convolutional neural network" OR cnn OR “machine learning” ) AND ALL ( "mandibular canal" OR "inferior alveolar canal" OR "inferior alveolar nerve" ) ) |           | 813               |
